# Supplementary material
Source: MDPI journal article supplement (https://www.mdpi.com/2071-1050/15/9/7040)
Supplement: s1 [file s1 › sustainability-2294980-supplementary.pdf]

## Supplementary Materials

**Table S1.** The physical and chemical properties of saline-alkali soil used in this study.

| Physicochemical properties     | Contents            |
|--------------------------------|---------------------|
| EC ( $\mu\text{S}/\text{cm}$ ) | $298.79 \pm 128.58$ |
| pH                             | $8.86 \pm 0.41$     |
| SOC (g/kg)                     | $10.59 \pm 1.22$    |
| TN (g/kg)                      | $0.62 \pm 0.20$     |
| TP (g/kg)                      | $0.17 \pm 0.04$     |
| AHN (mg/kg)                    | $42.88 \pm 23.40$   |
| AP (mg/kg)                     | $13.52 \pm 6.81$    |
| AK (mg/kg)                     | $124.13 \pm 29.14$  |
| Clay particle (%)              | $7.47 \pm 1.00$     |
| Silt particle (%)              | $34.34 \pm 3.27$    |
| Sand particle (%)              | $58.19 \pm 4.20$    |

*Note:* EC: electrical conductivity; SOM: soil organic matter; TN: total N; TP: total phosphorus; AHN: alkali-hydrolyzable N; AP: available phosphorus; AK: available potassium. Soil EC and pH were determined with a mixture of soil and water at a ratio of 1:10 (m/v).
